# Supplementary material for: Autonomic Alterations After Pulmonary Vein Isolation in the CIRCA‐DOSE (Cryoballoon vs Irrigated Radiofrequency Catheter Ablation) Study
Source: PubMed Central journal article supplement — J Am Heart Assoc. 2021 Feb 26;10(5):e018610. doi: 10.1161/JAHA.120.018610 (PMC8174287; doi:10.1161/jaha.120.018610), 2021-02-26
Supplement: JAH3-10-e018610-s001.pdf [file JAH3-10-e018610-s001.pdf]

# **SUPPLEMENTAL MATERIAL**

## **Appendix**

### **LIST OF INVESTIGATORS**

#### **STEERING COMMITTEE:**

Jason Andrade (Chair, Principal Investigator), Marc Deyell, Jean Champagne, Marc Dubuc, Peter Leong-Sit, Laurent Macle, Paul Novak, Jean-Francois Roux, John Sapp, Anthony Tang, Atul Verma, Paul Khairy

#### **INVESTIGATORS:**

**Vancouver General Hospital:** Jason Andrade, Matthew Bennett, Marc Deyell

**Montreal Heart Institute:** Laurent Macle, Paul Khairy, Marc Dubuc, Peter Guerra, Katia Dyrda, Lena Rivard

**Royal Jubilee Hospital:** Paul Novak, Lawrence Sterns, Rick Leather

**London, Ontario:** Peter Leong-Sit, Allan Skanes, Lorne Gula, Anthony Tang

**Quebec City, Quebec:** Jean Champagne, Isabelle Nault, Jean-Francois Sarrazin

**Sherbrooke, Quebec:** Mariano Badra, Jean-Francois Roux

**Dalhousie University:** John Sapp, Ratika Parkash

**St Michael's Hospital:** Iqwal Mangat, Paul Angaran

#### **CLINICAL EVENTS COMMITTEE:**

Clarence Khoo (Co-chair), Normand Racine (co-chair), Dr. Krishnan Ramanathan, Dr. Umjeet Singh Jolly, Dr. Andrew Ha, Dr. Christian Steinberg, Dr. Christopher Cheung, Dr. Jacques Rizkallah, Dr. Christopher Fordyce, Dr. Colette Seifer, Dr. Jean-Marc Raymond, Dr. Benedict Glover, Dr. Jimmy McKinney, Dr. Christina Luong

**Table S1. Baseline Characteristics by Sex.**

| Factor                                           | MALE              | FEMALE            | p-value |
|--------------------------------------------------|-------------------|-------------------|---------|
| Number                                           | 231               | 115               |         |
| Age, mean (SD)                                   | 57.7273 (10.2469) | 60.913 (9.05206)  | 0.005   |
| Hypertension                                     | 78 (33.8%)        | 42 (36.5%)        | 0.61    |
| Coronary Artery Disease                          | 23 (10.0%)        | 6 (5.2%)          | 0.13    |
| Heart Failure                                    | 2 (0.9%)          | 4 (3.5%)          | 0.080   |
| Stroke or TIA                                    | 7 (3.0%)          | 9 (7.8%)          | 0.045   |
| COPD                                             | 5 (2.2%)          | 2 (1.7%)          | 0.79    |
| Sleep Apnea                                      | 33 (14.3%)        | 12 (10.4%)        | 0.32    |
| Diabetes                                         | 19 (8.2%)         | 10 (8.7%)         | 0.88    |
| Smoker                                           | 13 (5.6%)         | 4 (3.5%)          | 0.38    |
| CHADSVASC*, median (IQR)                         | 1 (0, 1)          | 2 (1, 3)          | <0.001  |
| Number of AAD failed,<br>mean (SD)               | 1.85281 (.939463) | 1.84348 (.942108) | 0.93    |
| Left Atrial Volume,<br>mean (SD)                 | 35.0141 (15.8881) | 35.6463 (13.7734) | 0.78    |
| Left Ventricular Ejection<br>Fraction, mean (SD) | 59.32 (6.1589)    | 59.0022 (5.93829) | 0.69    |
| Body Mass Index,<br>mean (SD)                    | 29.1531 (5.29558) | 29.0113 (5.18053) | 0.81    |
| Systolic BP, mean (SD)                           | 129.67 (14.9463)  | 132.443 (21.2488) | 0.16    |
| Diastolic BP, mean (SD)                          | 77.3478 (9.2906)  | 76.313 (12.2018)  | 0.38    |

Data are mean  $\pm$  SD, median (interquartile range), or number (percent).

\*The CHA2DS2-VASc score is a clinical estimation of the risk of stroke in patients with atrial fibrillation, with scores ranging from 0 to 9, with higher scores indicating a greater risk.

Legend: AAD – antiarrhythmic drug, BP – blood pressure, COPD – chronic obstructive pulmonary disease, SD – standard deviation, TIA – transient ischemic attack

**Table S2. Baseline Characteristics by Age Category.**

| Factor                                        | <56 years         | 56-65 years       | >65 years         | p-value |
|-----------------------------------------------|-------------------|-------------------|-------------------|---------|
| Number                                        | 117               | 137               | 92                |         |
| Age, mean (SD)                                | 47.547 (6.33068)  | 60.6423 (2.70549) | 70.3152 (3.5485)  | <0.001  |
| Sex                                           | 25 (21.4%)        | 54 (39.4%)        | 36 (39.1%)        | 0.004   |
| Hypertension                                  | 24 (20.5%)        | 54 (39.4%)        | 42 (45.7%)        | <0.001  |
| Coronary Artery Disease                       | 4 (3.4%)          | 13 (9.5%)         | 12 (13.0%)        | 0.037   |
| Heart Failure                                 | 2 (1.7%)          | 0 (0.0%)          | 4 (4.3%)          | 0.047   |
| Stroke or TIA                                 | 3 (2.6%)          | 6 (4.4%)          | 7 (7.6%)          | 0.22    |
| COPD                                          | 1 (0.9%)          | 2 (1.5%)          | 4 (4.4%)          | 0.17    |
| Sleep Apnea                                   | 16 (13.7%)        | 21 (15.3%)        | 8 (8.7%)          | 0.33    |
| Diabetes                                      | 4 (3.4%)          | 13 (9.5%)         | 12 (13.0%)        | 0.037   |
| Smoker                                        | 9 (7.7%)          | 4 (2.9%)          | 4 (4.3%)          | 0.21    |
| CHADSVASC*, median (IQR)                      | 0 (0, 1)          | 1 (0, 2)          | 2 (1, 3)          | <0.001  |
| Number of AAD failed, mean (SD)               | 1.84615 (.906066) | 1.89051 (.952387) | 1.79348 (.966903) | 0.75    |
| Left Atrial Volume, mean (SD)                 | 32.3516 (10.6444) | 36.1156 (13.3478) | 37.3812 (21.9024) | 0.17    |
| Left Ventricular Ejection Fraction, mean (SD) | 59.6978 (5.99758) | 59.0245 (5.95717) | 58.8681 (6.41041) | 0.63    |
| Body Mass Index, mean (SD)                    | 28.4145 (5.23256) | 29.7277 (5.28585) | 29.0562 (5.15864) | 0.14    |
| Systolic BP, mean (SD)                        | 127.267 (14.3299) | 129.708 (17.2768) | 136.109 (19.5614) | <0.001  |
| Diastolic BP, mean (SD)                       | 77.7414 (10.1751) | 76.6715 (10.9505) | 76.5652 (9.67074) | 0.64    |

Data are mean  $\pm$  SD, median (IQR), or n (%).

\*The CHA2DS2-VASc score is a clinical estimation of the risk of stroke in patients with atrial fibrillation, with scores ranging from 0 to 9, with higher scores indicating a greater risk.

Legend: AAD – antiarrhythmic drug, BP – blood pressure, COPD – chronic obstructive pulmonary disease, SD – standard deviation, TIA – transient ischemic attack

**Table S3. Baseline Characteristics by Ablation Success.**

| Factor                                        | no AT/AF/AFL      | AT/AF/AFL         | p-value |
|-----------------------------------------------|-------------------|-------------------|---------|
| Number                                        | 182               | 164               |         |
| Age, mean (SD)                                | 57.3791 (10.0789) | 60.3476 (9.63225) | 0.006   |
| Sex                                           | 54 (29.7%)        | 61 (37.2%)        | 0.14    |
| Hypertension                                  | 57 (31.3%)        | 63 (38.4%)        | 0.17    |
| Coronary Artery Disease                       | 14 (7.7%)         | 15 (9.1%)         | 0.63    |
| Heart Failure                                 | 2 (1.1%)          | 4 (2.4%)          | 0.34    |
| Stroke or TIA                                 | 5 (2.7%)          | 11 (6.7%)         | 0.080   |
| COPD                                          | 4 (2.2%)          | 3 (1.8%)          | 0.81    |
| Sleep Apnea                                   | 20 (11.0%)        | 25 (15.2%)        | 0.24    |
| Diabetes                                      | 14 (7.7%)         | 15 (9.1%)         | 0.63    |
| Smoker                                        | 9 (4.9%)          | 8 (4.9%)          | 0.98    |
| CHADSVASC*, median (IQR)                      | 1 (0, 2)          | 1 (0, 2)          | 0.019   |
| Number of AAD failed, mean (SD)               | 1.81868 (.943183) | 1.88415 (.935984) | 0.52    |
| Left Atrial Volume, mean (SD)                 | 33.0709 (14.0905) | 37.7978 (16.1053) | 0.027   |
| Left Ventricular Ejection Fraction, mean (SD) | 59.8788 (5.90968) | 58.436 (6.19926)  | 0.051   |
| Body Mass Index, mean (SD)                    | 28.9778 (5.25211) | 29.2466 (5.26051) | 0.64    |
| Systolic BP, mean (SD)                        | 131.298 (18.35)   | 129.817 (16.1322) | 0.43    |
| Diastolic BP, mean (SD)                       | 77.6409 (10.4572) | 76.2988 (10.2072) | 0.23    |

Data are mean  $\pm$  SD, median (IQR), or n (%).

\*The CHA2DS2-VASc score is a clinical estimation of the risk of stroke in patients with atrial fibrillation, with scores ranging from 0 to 9, with higher scores indicating a greater risk.

Legend: AAD – antiarrhythmic drug, BP – blood pressure, COPD – chronic obstructive pulmonary disease, SD – standard deviation, TIA – transient ischemic attack

**Figure S1. Longitudinal changes over time; pre denotes the 30-day period before ablation; the rest were also 30-day periods measured starting at different months after ablation.**

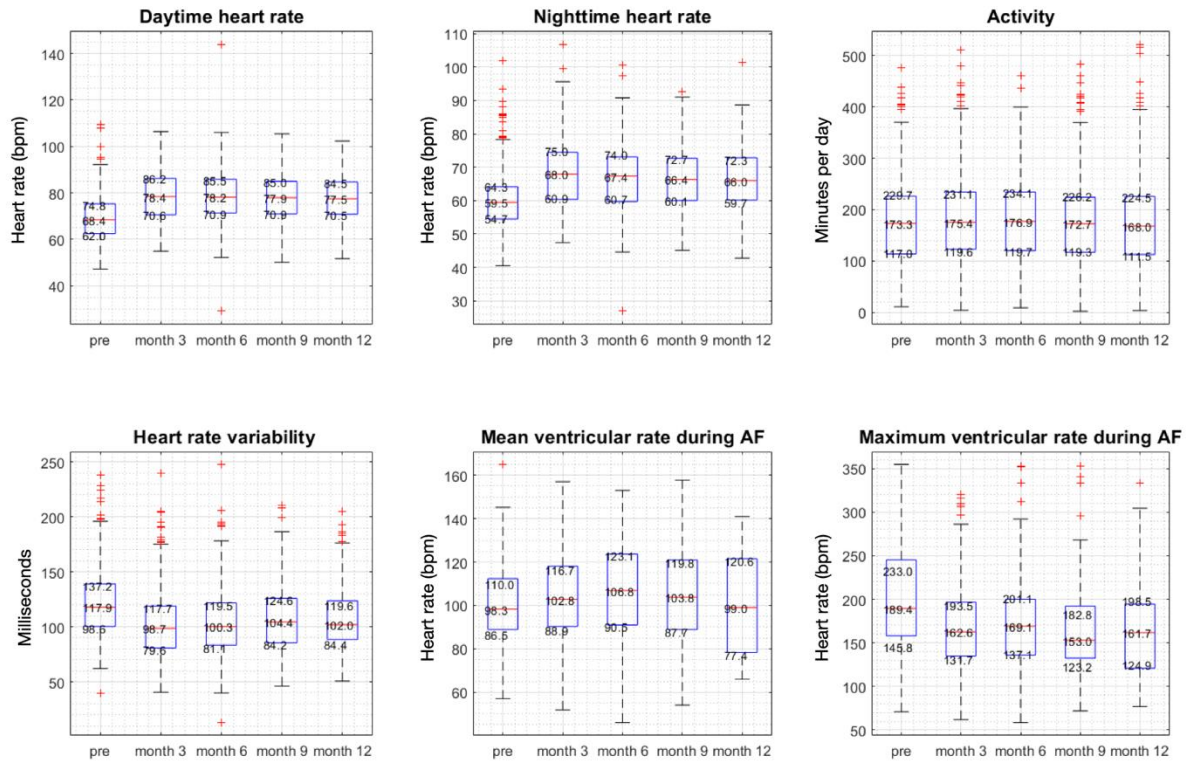

bpm – beats per minute

**Figure S2. Autonomic Alterations Pre- and Post-Pulmonary Vein Isolation, Stratified by Sex.**

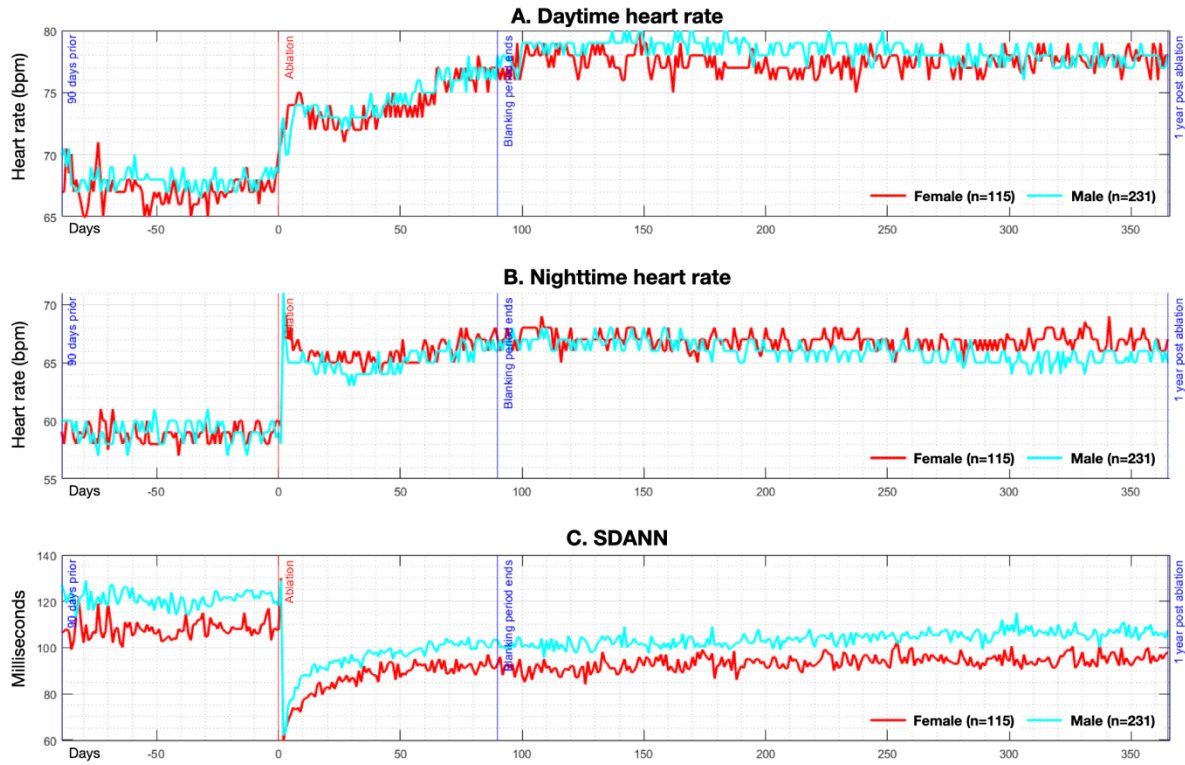

Pictured are median values of the daytime heart rate (panel A), mean nighttime heart rate (Panel B), and mean heart rate variability (Panel C). Date of ablation is noted as time zero on the Y axis, with a range of -100 days prior to ablation, and +365 days post ablation. Blue line depicts male patients; magenta lines depict female patients. bpm – beats per minute, msec - milliseconds

**Figure S3. Autonomic Alterations Pre- and Post-Pulmonary Vein Isolation, Stratified by Age.**

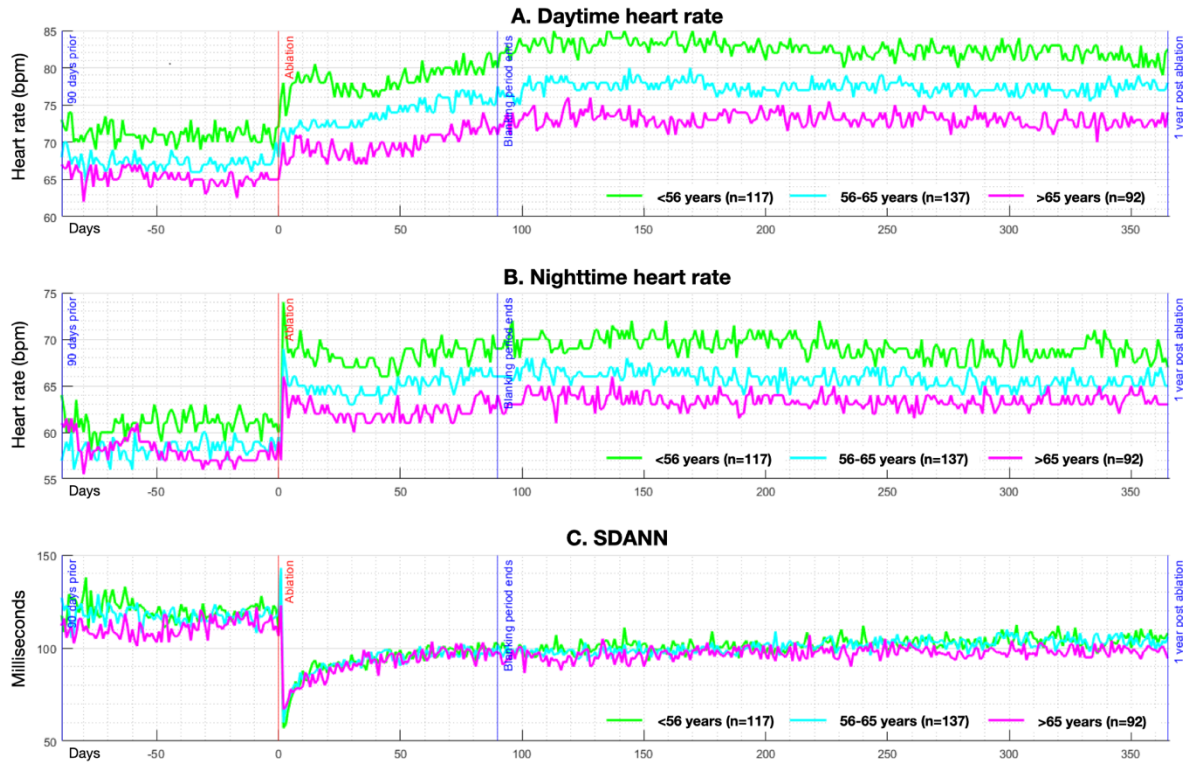

Pictured are the median values of the daytime heart rate (panel A), mean nighttime heart rate (Panel B), and mean heart rate variability (Panel C). Date of ablation is noted as time zero on the Y axis, with a range of -100 days prior to ablation, and +365 days post ablation. Green line depicts patients <56 years of age, blue line depicts patients 56-65 years of age, and magenta line depicts those >66 years of age. bpm – beats per minute, msec – milliseconds.
